# Supplementary material for: Comparison of Newtonian and Special-Relativistic Trajectories with the General-Relativistic Trajectory for a Low-Speed Weak-Gravity System
Source: PLOS journal article supplement (doi:10.1371/journal.pone.0034720), 2012-04-19
Supplement: S2 (10.1371/journal.pone.0034720.s002) [file journal.pone.0034720.s002.pdf]

## Text S2. Newtonian and relativistic free-fall motion.

Here we consider the radial motion of a particle of mass  $m$  due to the gravitational field of a uniform sphere of mass  $M$  and radius  $R$ .

In the Newtonian framework, the change in gravitational potential energy of the particle from an initial position  $r_0$  to a final position  $r$  is given by

$$\Delta U = U(r) - U(r_0) = -GMm \left[ \frac{1}{r} - \frac{1}{r_0} \right]. \quad (\text{B1})$$

If the distance travelled by the particle is small compared to  $r_0$ , that is,  $|r - r_0|/r_0 \ll 1$ , then  $1/r$  is essentially given by

$$\frac{1}{r} = \frac{1}{r_0} \left( 1 + \frac{r - r_0}{r_0} \right)^{-1} \approx \frac{1}{r_0} \left( 1 - \frac{r - r_0}{r_0} \right) = \frac{1}{r_0} - \frac{r - r_0}{r_0^2}, \quad (\text{B2})$$

since higher-order terms involving  $(r - r_0)/r_0$  are negligible. If the particle is initially near the surface of the sphere, that is,  $r_0 \approx R$ , then

$$GM/r_0^2 \approx GM/R^2 = g. \quad (\text{B3})$$

Substituting Eqs. (B2) and (B3) into Eq. (B1) reduces Eq. (B1) to approximately the change in gravitational potential energy of a particle in a uniform gravitational field

$$\Delta U \approx mgr - mgr_0. \quad (\text{B4})$$

The Newtonian position and velocity of the particle at time  $t$  are therefore given by the well-known equations:

$$r - r_0 = v_0(t - t_0) - \frac{1}{2}g(t - t_0)^2, \quad (\text{B5})$$

$$v = v_0 - g(t - t_0). \quad (\text{B6})$$

In the special-relativistic framework, if  $|r - r_0|/r_0 \ll 1$  and  $r_0 \approx R$ , Eqs. (B2) and (B3)

reduce the change in gravitational potential energy of the particle to

$$\Delta U = -\frac{GMm}{\sqrt{1-(v/c)^2}} \left[ \frac{1}{r} - \frac{1}{r_0} \right] \approx \frac{mgr - mgr_0}{\sqrt{1-(v/c)^2}}. \quad (\text{B7})$$

Solution of the special-relativistic equation of motion with the force derived from the gravitational potential energy  $U(r)$  in Eq. (B7) yields [1-3]

$$r - r_0 = -(c^2 / g) \ln \left\{ \frac{1}{2} \left[ \left( 1 + \frac{v_0}{c} \right) e^{-g(t-t_0)/c} + \left( 1 - \frac{v_0}{c} \right) e^{g(t-t_0)/c} \right] \right\}, \quad (\text{B8})$$

$$v = c \left[ \frac{(1 + v_0 / c) e^{-g(t-t_0)/c} - (1 - v_0 / c) e^{g(t-t_0)/c}}{(1 + v_0 / c) e^{-g(t-t_0)/c} + (1 - v_0 / c) e^{g(t-t_0)/c}} \right] \quad (\text{B9})$$

for the position and velocity of the particle at time  $t$ .

In the general-relativistic framework, the gravitational field outside the uniform sphere is described by the Schwarzschild metric [4] in terms of the Schwarzschild coordinates  $(ct, r, \theta, \phi)$

$$ds^2 = c^2 d\tau^2 = \left( 1 - \frac{r_s}{r} \right) c^2 dt^2 - \frac{dr^2}{\left( 1 - \frac{r_s}{r} \right)} - r^2 (d\theta^2 + \sin^2 \theta d\phi^2), \quad (\text{B10})$$

where  $ds$  is the interval between neighboring events,  $\tau$  is the proper time, and  $r_s = 2GM/c^2$  is the Schwarzschild radius. For purely radial motion [3,5] along the line  $\phi = \text{constant}$  in the equatorial plane  $\theta = \pi/2$ , the metric Eq. (B10) is simplified, with  $d\phi = d\theta = 0$ , to

$$ds^2 = c^2 d\tau^2 = \left(1 - \frac{r_s}{r}\right) c^2 dt^2 - \frac{dr^2}{\left(1 - r_s/r\right)} \quad (\text{B11})$$

and the geodesic equations are reduced to

$$\frac{cd^2t}{c^2 d\tau^2} + \left(\frac{r_s/r^2}{1 - r_s/r}\right) \frac{cdt}{cd\tau} \frac{dr}{cd\tau} = 0, \quad (\text{B12})$$

$$\frac{d^2r}{c^2 d\tau^2} + \left(1 - \frac{r_s}{r}\right) \left(\frac{r_s}{2r^2}\right) \left(\frac{cdt}{cd\tau}\right)^2 - \left(1 - \frac{r_s}{r}\right)^{-1} \left(\frac{r_s}{2r^2}\right) \left(\frac{dr}{cd\tau}\right)^2 = 0. \quad (\text{B13})$$

The local velocity [4,6] of the particle, measured by a local observer who is at rest at a particular Schwarzschild radial coordinate and is next to the particle, is

$$v = \left(1 - \frac{r_s}{r}\right)^{-1} \frac{dr}{dt} = \left(1 - \frac{2GM}{c^2 r}\right)^{-1} \frac{dr}{dt}. \quad (\text{B14})$$

The integral of Eq. (B12), which is given by

$$\frac{cdt}{cd\tau} = k \left(1 - \frac{r_s}{r}\right)^{-1}, \quad (\text{B15})$$

where  $k$  is a constant, and the integral of Eq. (B13), which is given by Eq. (B11), together with the initial condition  $v = v_0$  at  $r = r_0$ , lead to the following expression for  $dr/dt$ :

$$\left(\frac{dr}{dt}\right)^2 = \left(1 - \frac{2GM}{c^2 r}\right)^2 \left(1 - \frac{2GM}{c^2 r_0}\right)^{-1} \left[ v_0^2 \left(1 - \frac{2GM}{c^2 r}\right) + 2GM \left(\frac{1}{r} - \frac{1}{r_0}\right) \right]. \quad (\text{B16})$$

If  $|r - r_0|/r_0 \ll 1$  and  $r_0 \approx R$ , substituting Eqs. (B2) and (B3) into Eq. (B16) and integrating it with initial condition  $r = r_0$  at  $t = t_0$  yields the general-relativistic position of the particle at time  $t$

$$r - r_0 = -\frac{c^2}{2g} \left(1 - \frac{2gr_0}{c^2}\right) \left\{ 1 - \left\{ \frac{1}{2} \left[ \left(1 + \frac{v_0}{c}\right) e^{-\frac{g(t-t_0)}{c}} + \left(1 - \frac{v_0}{c}\right) e^{\frac{g(t-t_0)}{c}} \right] \right\}^{-2} \right\}. \quad (\text{B17})$$

In the limit of weak gravity ( $2gr/c^2 \ll 1$  and  $2gr_0/c^2 \ll 1$ ), Eq. (B17) reduces to the special-relativistic Eq. (B8). In the limit of weak gravity and low speed ( $v/c \ll 1$ ,  $v_0/c \ll 1$  and  $g(t - t_0)/c \ll 1$ ), Eq. (B17) reduces to the Newtonian Eq. (B5).

Substituting Eqs. (B14), (B2), (B3) and (B17) sequentially into Eq. (B16) yields the general-relativistic velocity of the particle at time  $t$ , which is the same as the special-relativistic Eq. (B9). In the limit of low speed, Eq. (B9) reduces to the Newtonian Eq. (B6).

## References

1. Lapidus IR (1972) The falling body problem in general relativity. Am. J. Phys. 40: 1509-1510.
2. Lapidus IR (1972) Motion of a relativistic particle acted upon by a constant force and a uniform gravitational field. Am. J. Phys. 40: 984-988.
3. Srinivasa Rao KN (1966) The motion of a falling particle in a Schwarzschild field. Ann. Inst. Henri Poincare, Sect. A 5: 227-233.
4. Landau LD, Lifshitz EM (1975) The classical theory of fields. Oxford: Pergamon Press.
5. Srinivasa Rao KN, Gopala Rao AV (1974) Falling body in the theories of

gravitation. J. Phys. A 7: 485-488.

6. Zel'dovich YaB, Novikov ID (1996) Relativistic astrophysics vol. 1: Stars and relativity. New York: Dover Publications.
